# Supplementary figures and images for: Prolonged Social Isolation, Started Early in Life, Impairs Cognitive Abilities in Rats Depending on Sex
Source: MDPI journal article supplement (doi:10.3390/brainsci10110799), 2020-10-30

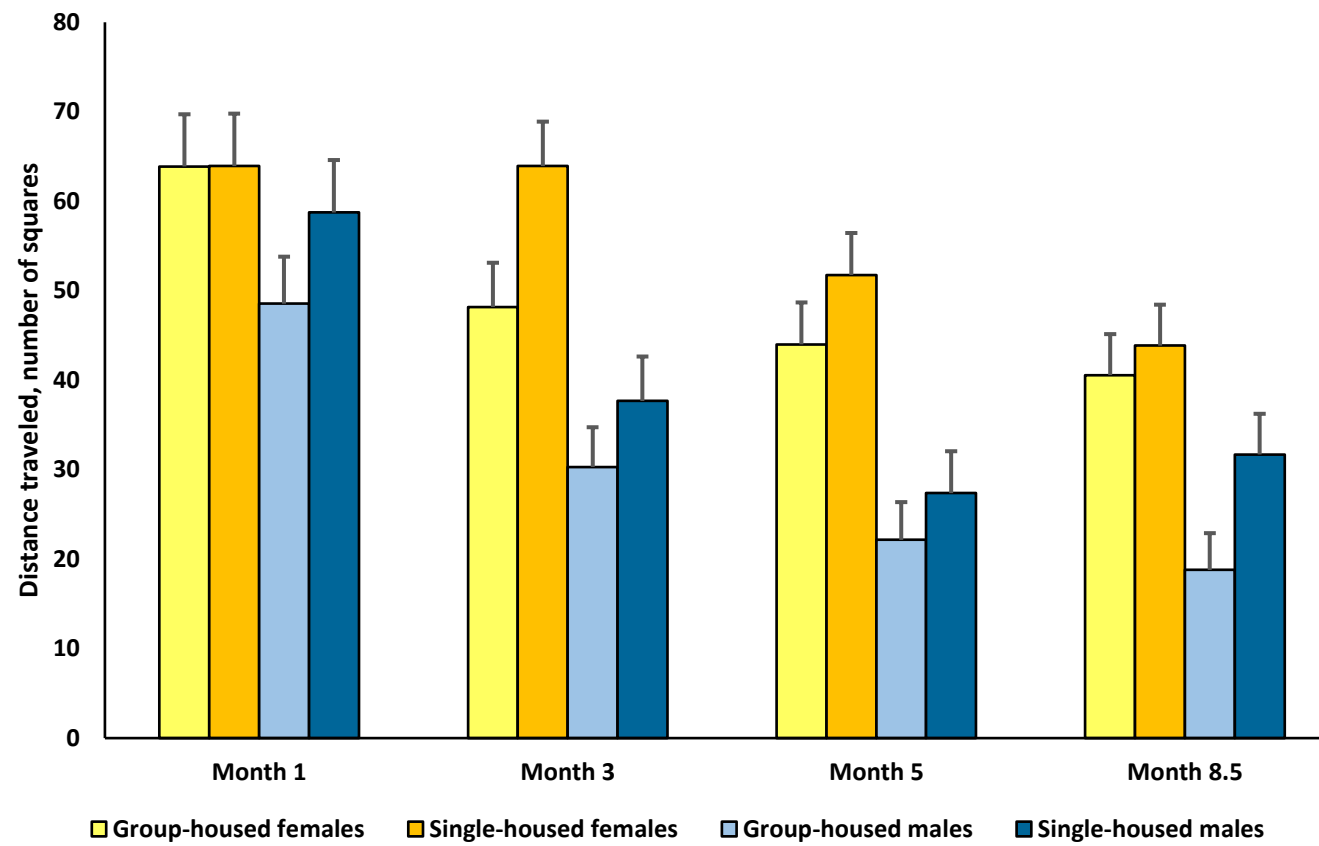

Supplement: s1 [file s1]

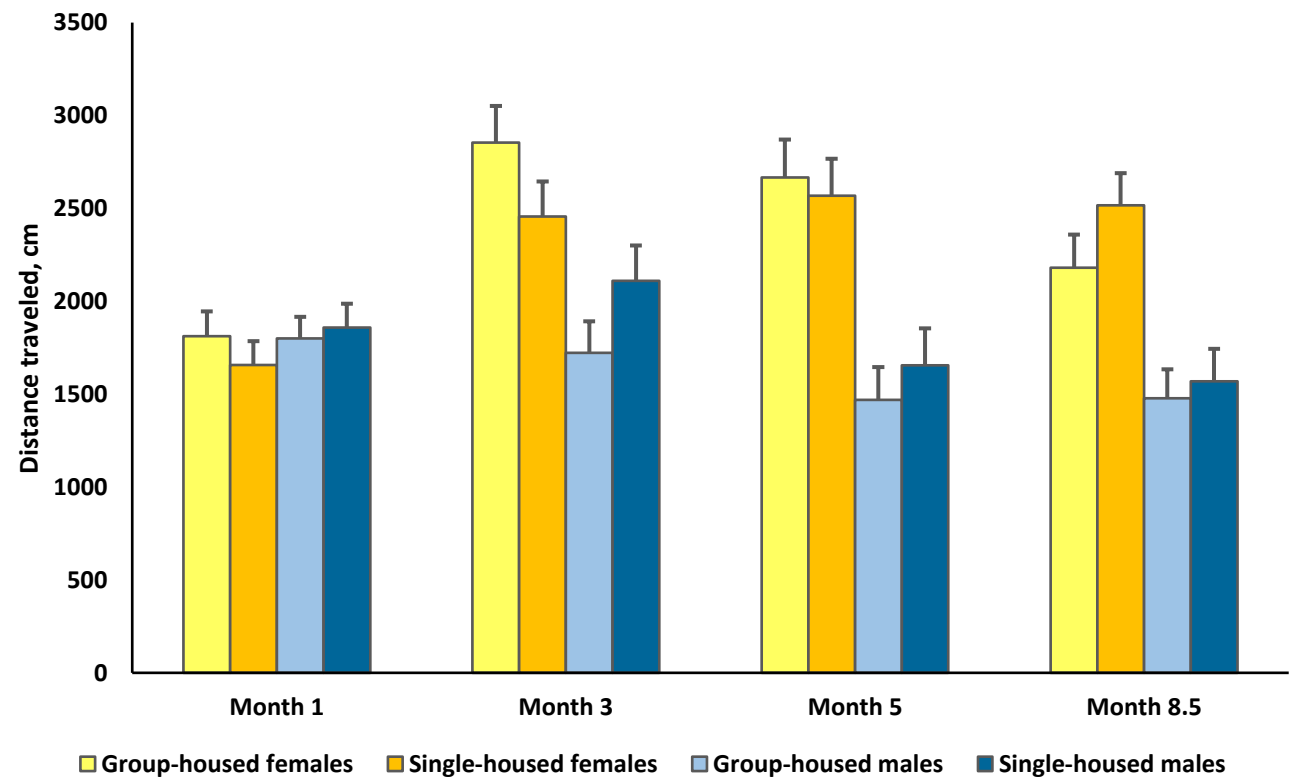

Supplement: s1 [file s1]
